# Supplementary material
Source: PubMed Central journal article supplement (PMC2943150)
Supplement: NIHMS145668-supplement-1_si_001.pdf [file NIHMS145668-supplement-1_si_001.pdf]

# Supporting Information

## Design, Synthesis, Protein-ligand X-ray Structures and Biological Evaluation of a Series of Novel Macrocyclic HIV-1 Protease Inhibitors to Combat Drug-resistance

*Arun K. Ghosh,\* Sarang Kulkarni, David D. Anderson, Lin Hong, Abigail Baldrige, Yuan-Fang Wang, Alexander A. Chumanevich, § Andrey Y. Kovalevsky, Yasushi Tojo, Yasuhiro Koh, Jordan Tang, Irene T. Weber, and Hiroaki Mitsuya*

### Table of Contents:

|                                                                                          |    |
|------------------------------------------------------------------------------------------|----|
| Table 1. HPLC purity of inhibitors <b>14a-h</b> and <b>15a-g</b> .....                   | S2 |
| Table 2. HPLC purity of inhibitors <b>19a-c</b> through <b>22a-c</b> .....               | S3 |
| Table 3. High resolution mass spectrometry data for all inhibitors .....                 | S4 |
| Table 4. Crystallographic data collection and refinement statistics for <b>14c</b> ..... | S5 |
| Table 5. Crystallographic data collection and refinement statistics for <b>2</b> .....   | S6 |

### Enlarged figures from manuscript:

|                                                                           |    |
|---------------------------------------------------------------------------|----|
| Figure 2. Overlay of <b>15c</b> with <b>2</b> -bound HIV-1 protease ..... | S7 |
| Figure 3. A stereoview of the X-ray structure of <b>14c</b> .....         | S8 |

**Table 1.** HPLC purity of inhibitors **14a-h** and **15a-g**

| Inhibitor    | Method A             |                 | Method B             |                 |
|--------------|----------------------|-----------------|----------------------|-----------------|
|              | R <sub>t</sub> (min) | Purity (area %) | R <sub>t</sub> (min) | Purity (area %) |
| <b>14a-E</b> | 10.9                 | 98              | 11.8                 | 98              |
| <b>14a-Z</b> | 10.8                 | 99              | 13.6                 | 99              |
| <b>14b-E</b> | 11.2                 | 98              | 13.1                 | 97              |
| <b>14b-Z</b> | 11.3                 | 96              | 13.3                 | 96              |
| <b>14c-E</b> | 10.7                 | 98              | 12.9                 | 99              |
| <b>14c-Z</b> | 10.4                 | 97              | 12.7                 | 97              |
| <b>14d</b>   | 9.3                  | 98              | 11.6                 | 97              |
| <b>14e</b>   | 9.8                  | 99              | 12.0                 | 98              |
| <b>14f</b>   | 9.0                  | 99              | 11.1                 | 97              |
| <b>14g</b>   | 8.3                  | 98              | 10.4                 | 96              |
| <b>14h</b>   | 6.6                  | 99              | 9.7                  | 97              |
| <b>15a</b>   | 12.7                 | 98              | 14.3                 | 98              |
| <b>15b</b>   | 12.0                 | 99              | 13.6                 | 99              |
| <b>15c</b>   | 13.2                 | 97              | 10.5                 | 97              |
| <b>15d</b>   | 10.1                 | 98              | 12.2                 | 99              |
| <b>15e</b>   | 9.3                  | 99              | 11.4                 | 99              |
| <b>15f</b>   | 8.4                  | 99              | 10.7                 | 97              |
| <b>15g</b>   | 6.7                  | 99              | 10.0                 | 98              |

HPLC conditions:

- Method A = Zorbax XDB-C<sub>18</sub> (150 x 4.6 mm, 5 micron); Flow = 1.5 mL/min; Gradient T = 0-1 min (25:75 MeCN:H<sub>2</sub>O); T = 15-17 min (10:90% MeCN:H<sub>2</sub>O), T = 17.1-20 min (25:75 MeCN:H<sub>2</sub>O); T = 25 °C; λ = 215 nm.
- Method B = Zorbax XDB-C<sub>18</sub> (150 x 4.6 mm, 5 micron); Flow = 1.5 mL/min; Gradient T = 0-1 min (30:70 MeOH:H<sub>2</sub>O); T = 15-17 min (95:5 MeOH:H<sub>2</sub>O), T = 17.1-20 min (30:70 MeOH:H<sub>2</sub>O); T = 25 °C; λ = 215 nm.

**Table 2.** HPLC purity of inhibitors **19a-c** through **22a-c**.

| Inhibitor      | R <sub>t</sub> (min) | Purity (area %) |
|----------------|----------------------|-----------------|
| <b>19a</b>     | 14.2                 | 99.5            |
| <b>20a</b>     | 13.4                 | 100.0           |
| <b>21a</b>     | 13.5                 | 99.6            |
| <b>22a</b>     | 13.9                 | 97.2            |
| <b>19b/19c</b> | 14.1                 | 99.6            |
| <b>20b</b>     | 12.9                 | 100.0           |
| <b>21b</b>     | 13.3                 | 99.6            |
| <b>22b</b>     | 13.4                 | 97.2            |
| <b>19c</b>     | 14.1                 | 99.6            |
| <b>20c</b>     | 12.9                 | 100.0           |
| <b>21c</b>     | 13.1                 | 99.7            |
| <b>22c</b>     | 13.5                 | 97.1            |

HPLC conditions: Zorbax XDB-C<sub>18</sub> (150 x 4.6 mm, 5 micron); Flow = 1.5 mL/min; Gradient T = 0-1 min (30:70 MeOH:H<sub>2</sub>O); T = 15-18 min (100% MeOH), T = 18.1-21 min (30:70 MeOH:H<sub>2</sub>O); T = 35 °C; λ = 215 nm.

**Table 3.** High resolution mass spectrometry data for all inhibitors

| Inhibitor    | Molecular Formula                                                 | Ion                 | Calculated | Found    | Inhibitor      | Molecular Formula                                               | Ion                 | Calculated | Found    |
|--------------|-------------------------------------------------------------------|---------------------|------------|----------|----------------|-----------------------------------------------------------------|---------------------|------------|----------|
| <b>14a-E</b> | C <sub>34</sub> H <sub>46</sub> N <sub>2</sub> O <sub>9</sub> S   | [M+Na] <sup>+</sup> | 681.2822   | 681.2815 | <b>15e</b>     | C <sub>30</sub> H <sub>40</sub> N <sub>2</sub> O <sub>9</sub> S | [M+Na] <sup>+</sup> | 605.2533   | 605.2526 |
| <b>14a-Z</b> | C <sub>34</sub> H <sub>46</sub> N <sub>2</sub> O <sub>9</sub> S   | [M+Na] <sup>+</sup> | 681.2822   | 681.2819 | <b>15f</b>     | C <sub>29</sub> H <sub>38</sub> N <sub>2</sub> O <sub>9</sub> S | [M+H] <sup>+</sup>  | 591.2376   | 591.2381 |
| <b>14b-E</b> | C <sub>33</sub> H <sub>44</sub> N <sub>2</sub> O <sub>9</sub> S   | [M+Na] <sup>+</sup> | 667.2665   | 667.2660 | <b>15g</b>     | C <sub>28</sub> H <sub>36</sub> N <sub>2</sub> O <sub>9</sub> S | [M+H] <sup>+</sup>  | 577.2220   | 577.2222 |
| <b>14b-Z</b> | C <sub>33</sub> H <sub>44</sub> N <sub>2</sub> NaO <sub>9</sub> S | [M+Na] <sup>+</sup> | 667.2665   | 667.2667 | <b>19a</b>     | C <sub>37</sub> H <sub>52</sub> N <sub>2</sub> O <sub>9</sub> S | [M+H] <sup>+</sup>  | 701.3472   | 701.3473 |
| <b>14c-E</b> | C <sub>32</sub> H <sub>42</sub> N <sub>2</sub> O <sub>9</sub> S   | [M+H] <sup>+</sup>  | 631.2689   | 631.2698 | <b>20a</b>     | C <sub>35</sub> H <sub>48</sub> N <sub>2</sub> O <sub>9</sub> S | [M+Na] <sup>+</sup> | 695.2978   | 695.2970 |
| <b>14c-Z</b> | C <sub>32</sub> H <sub>42</sub> N <sub>2</sub> O <sub>9</sub> S   | [M+H] <sup>+</sup>  | 631.2689   | 631.2706 | <b>21a</b>     | C <sub>35</sub> H <sub>48</sub> N <sub>2</sub> O <sub>9</sub> S | [M+Na] <sup>+</sup> | 695.2978   | 695.2989 |
| <b>14d</b>   | C <sub>31</sub> H <sub>40</sub> N <sub>2</sub> O <sub>9</sub> S   | [M+H] <sup>+</sup>  | 617.2533   | 617.2534 | <b>22a</b>     | C <sub>35</sub> H <sub>50</sub> N <sub>2</sub> O <sub>9</sub> S | [M+H] <sup>+</sup>  | 675.3315   | 675.3318 |
| <b>14e</b>   | C <sub>31</sub> H <sub>40</sub> N <sub>2</sub> O <sub>9</sub> S   | [M+Na] <sup>+</sup> | 639.2352   | 639.2345 | <b>19b/19c</b> | C <sub>36</sub> H <sub>50</sub> N <sub>2</sub> O <sub>9</sub> S | [M+Na] <sup>+</sup> | 709.3135   | 709.3131 |
| <b>14f</b>   | C <sub>30</sub> H <sub>38</sub> N <sub>2</sub> O <sub>9</sub> S   | [M+H] <sup>+</sup>  | 603.2376   | 603.2369 | <b>20b</b>     | C <sub>34</sub> H <sub>46</sub> N <sub>2</sub> O <sub>9</sub> S | [M+Na] <sup>+</sup> | 681.2822   | 681.2829 |
| <b>14g</b>   | C <sub>29</sub> H <sub>36</sub> N <sub>2</sub> O <sub>9</sub> S   | [M+Na] <sup>+</sup> | 611.2039   | 611.2040 | <b>21b</b>     | C <sub>34</sub> H <sub>46</sub> N <sub>2</sub> O <sub>9</sub> S | [M+Na] <sup>+</sup> | 681.2822   | 681.2825 |
| <b>14h</b>   | C <sub>28</sub> H <sub>34</sub> N <sub>2</sub> O <sub>9</sub> S   | [M+Na] <sup>+</sup> | 597.1883   | 597.1887 | <b>22b</b>     | C <sub>34</sub> H <sub>48</sub> N <sub>2</sub> O <sub>9</sub> S | [M+Na] <sup>+</sup> | 683.2978   | 683.2987 |
| <b>15a</b>   | C <sub>34</sub> H <sub>48</sub> N <sub>2</sub> O <sub>9</sub> S   | [M+Na] <sup>+</sup> | 683.2978   | 683.2984 | <b>19c</b>     | C <sub>36</sub> H <sub>50</sub> N <sub>2</sub> O <sub>9</sub> S | [M+Na] <sup>+</sup> | 709.3135   | 709.3139 |
| <b>15b</b>   | C <sub>33</sub> H <sub>46</sub> N <sub>2</sub> O <sub>9</sub> S   | [M+Na] <sup>+</sup> | 669.2822   | 669.2828 | <b>20c</b>     | C <sub>34</sub> H <sub>46</sub> N <sub>2</sub> O <sub>9</sub> S | [M+Na] <sup>+</sup> | 681.2822   | 681.2819 |
| <b>15c</b>   | C <sub>32</sub> H <sub>44</sub> N <sub>2</sub> O <sub>9</sub> S   | [M+Na] <sup>+</sup> | 655.2668   | 655.2667 | <b>21c</b>     | C <sub>34</sub> H <sub>46</sub> N <sub>2</sub> O <sub>9</sub> S | [M+Na] <sup>+</sup> | 681.2822   | 681.2812 |
| <b>15d</b>   | C <sub>31</sub> H <sub>42</sub> N <sub>2</sub> O <sub>9</sub> S   | [M+Na] <sup>+</sup> | 641.2509   | 641.2512 | <b>22c</b>     | C <sub>34</sub> H <sub>48</sub> N <sub>2</sub> O <sub>9</sub> S | [M+Na] <sup>+</sup> | 683.2978   | 683.2976 |

**Table 4.** Data collection and refinement statistics for inhibitor **14c**

|                                                | <b>14c</b>                       |
|------------------------------------------------|----------------------------------|
| Space group                                    | P2 <sub>1</sub> 2 <sub>1</sub> 2 |
| Unit cell dimensions: (Å)                      |                                  |
| a                                              | 58.76                            |
| b                                              | 86.33                            |
| c                                              | 45.98                            |
| Resolution range (Å)                           | 50-1.17                          |
| Unique reflections                             | 72,239                           |
| R <sub>merge</sub> (%) overall (final shell)   | 10.8 (45.7)                      |
| I/σ(I) overall (final shell)                   | 14.7 (2.4)                       |
| Completeness (%) overall (final shell)         | 90.9 (52.6)                      |
| Data range for refinement (Å)                  | 10-1.17                          |
| R (%)                                          | 16.0                             |
| R <sub>free</sub> (%)                          | 19.4                             |
| No. of solvent atoms (total occupancies)       | 181 (166.8)                      |
| RMS deviation from ideality                    |                                  |
| Bonds (Å)                                      | 0.014                            |
| Angle distance (Å)                             | 0.034                            |
| Average B-factors (Å <sup>2</sup> )            |                                  |
| Main-chain atoms                               | 14.5                             |
| Side-chain atoms                               | 18.8                             |
| Inhibitor                                      | 12.1                             |
| Solvent                                        | 26.7                             |
| Residual density (max/min) (eÅ <sup>-3</sup> ) | 0.31/-0.26                       |
| Relative occupancy of inhibitor 1              | 0.5/0.5                          |
| RMS deviation (Å) with PR-DRV (2IEN)           | 0.33                             |

**Table 5.** Crystallographic Data Collection and Refinement Statistics for inhibitor **2**

|                                                          |                                               |
|----------------------------------------------------------|-----------------------------------------------|
| Space group                                              | P2 <sub>1</sub> 2 <sub>1</sub> 2 <sub>1</sub> |
| Unit cell dimensions: (Å)                                |                                               |
| a                                                        | 51.9                                          |
| b                                                        | 59.0                                          |
| c                                                        | 62.6                                          |
| Resolution range (Å)                                     | 20-1.7                                        |
| Unique reflections                                       | 20,809                                        |
| R <sub>merge</sub> (%) overall (final shell 1.76-1.70 Å) | 5.2 (39.6)                                    |
| I/σ(I) overall (final shell 1.76-1.70 Å)                 | 17.7 (2.8)                                    |
| Completeness (%) overall (final shell)                   | 95.5 (92.4)                                   |
| Data range for refinement (Å)                            | 20-1.70                                       |
| R <sub>work</sub> (%)                                    | 21.6                                          |
| R <sub>free</sub> (%)                                    | 28.9                                          |
| No. of solvent atoms                                     | 100                                           |
| RMS deviation from ideality                              |                                               |
| Bonds (Å)                                                | 0.009                                         |
| Angle (degree)                                           | 1.5                                           |
| Average B-factors (Å <sup>2</sup> )                      |                                               |
| Protein                                                  | 28.3                                          |
| Inhibitor                                                | 19.6                                          |
| Solvent                                                  | 41.0                                          |

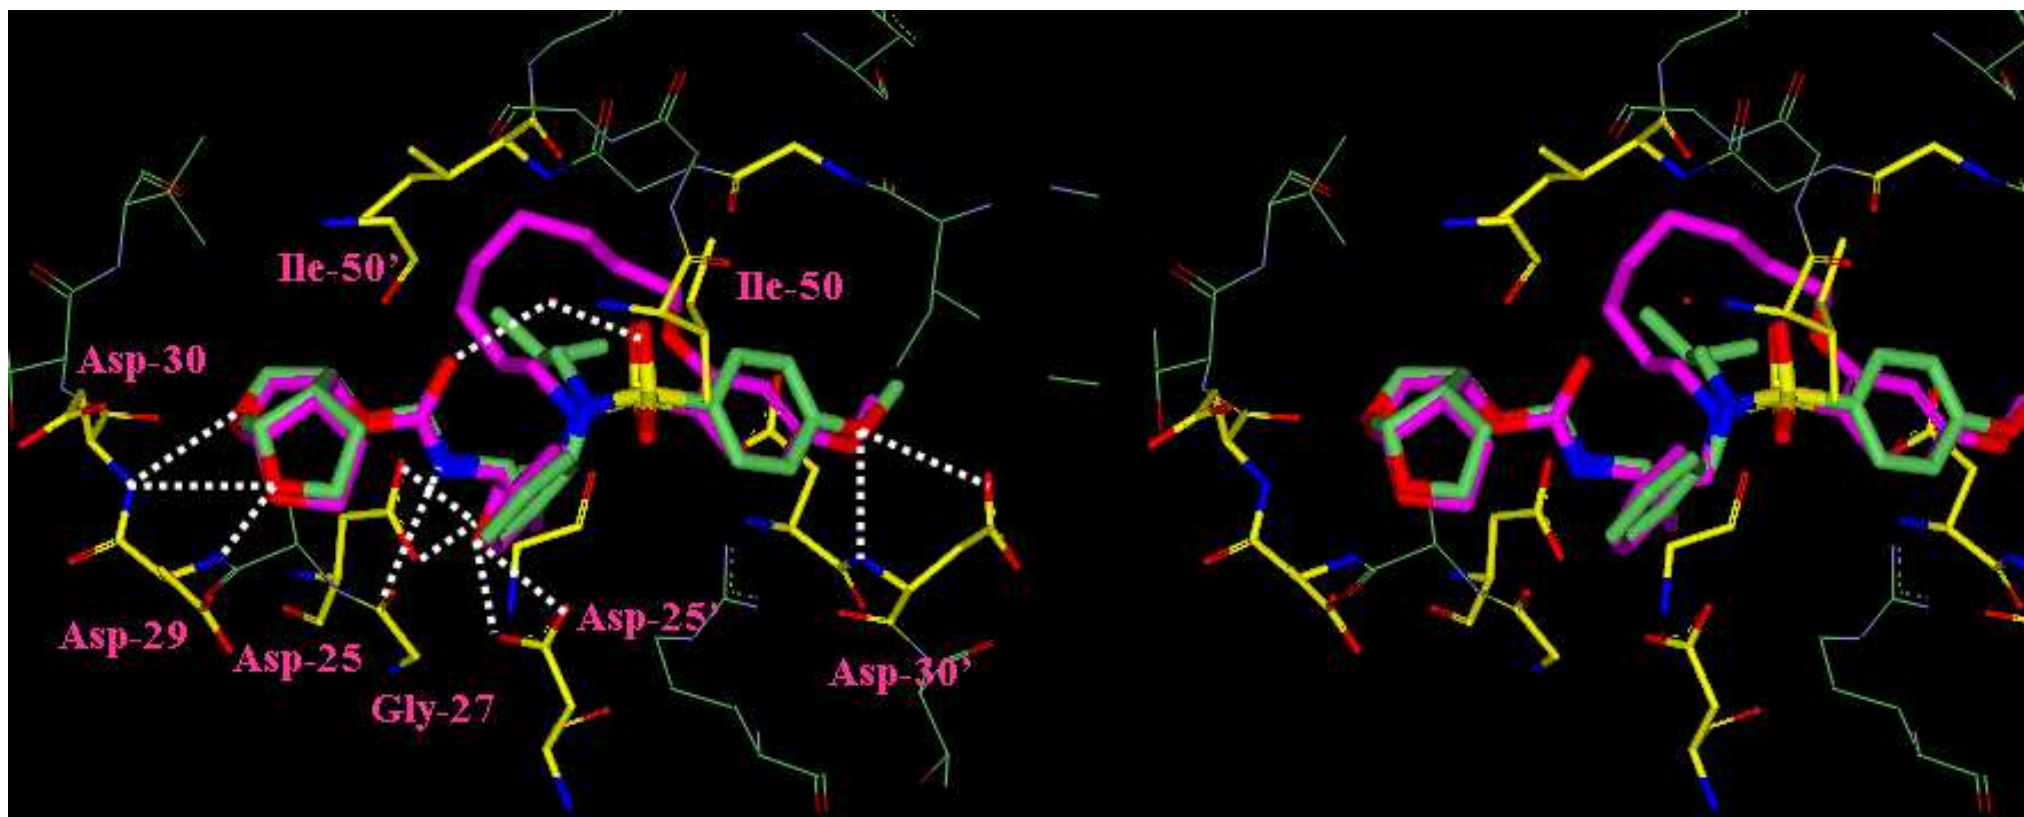

**Figure 2.** An overlay of energy-minimized macrocyclic inhibitor **15c** (magenta) with the X-ray structure of inhibitor **2** (green)-bound HIV-1 protease.

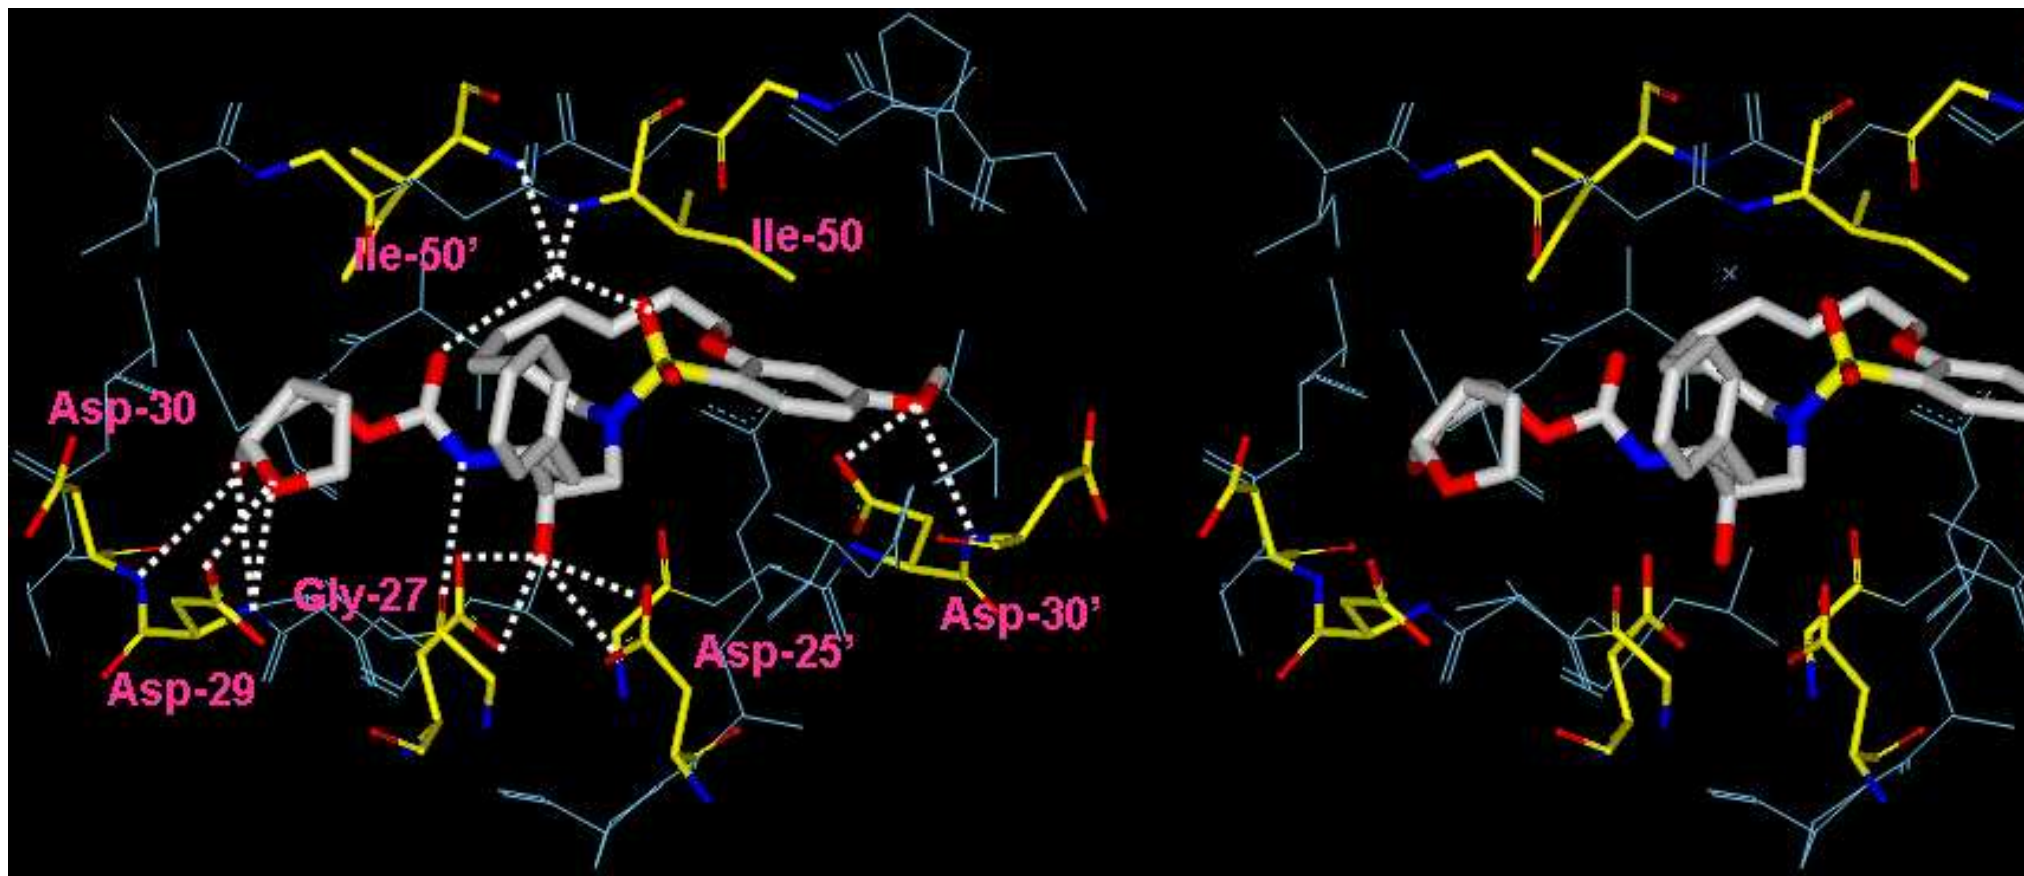

**Figure 3.** A stereoview of the X-ray structure of macrocyclic inhibitor **14c** (light gray)-bound HIV-1 protease. All strong hydrogen bonding interactions are shown as dotted lines.
